# Supplementary material for: A Laser-Induced Photoelectrochemical Sensor for Natural Sweat Cu2+ Detection
Source: MDPI journal article supplement (doi:10.3390/chemosensors10050169), 2022-05-02
Supplement: s1 [file s1]

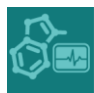

# A Laser-induced Photoelectrochemical Sensor for Natural Sweat $\text{Cu}^{2+}$ Detection

Shubo Zhang, Yanwen Liu, Juan Wang\* and Zhihong Liu\*

College of Chemistry and Chemical Engineering, Hubei University, Wuhan 430062, China;  
201911110610968@stu.hubu.edu.cn (S.B.Z.); 201911110610890@stu.hubu.edu.cn (Y.W.L.)

\* Correspondence: juanwang@hubu.edu.cn (J.W.); zhliu@whu.edu.cn (Z.H.L.)

## Table of contents

|                                                                                               |     |
|-----------------------------------------------------------------------------------------------|-----|
| Figure S1. Photos of the laser engraving machine.....                                         | SM2 |
| Figure S2. Images of the laser engraving process for the preparation of LIG-In-CdS.....       | SM2 |
| Figure S3. Optimization of the Cys concentration and the concentration ratio of Cd and In.... | SM3 |
| Figure S4. SEM and TEM images of laser-induced electrodes.....                                | SM3 |
| Figure S5. Elemental mapping images of LIG-In and LIG-CdS.....                                | SM3 |
| Figure S6. XRD patterns and XPS survey spectra of laser-induced electrodes.....               | SM4 |
| Figure S7. Elemental mapping images of LIG-In-CdS/ $\text{Cu}^{2+}$ .....                     | SM4 |

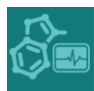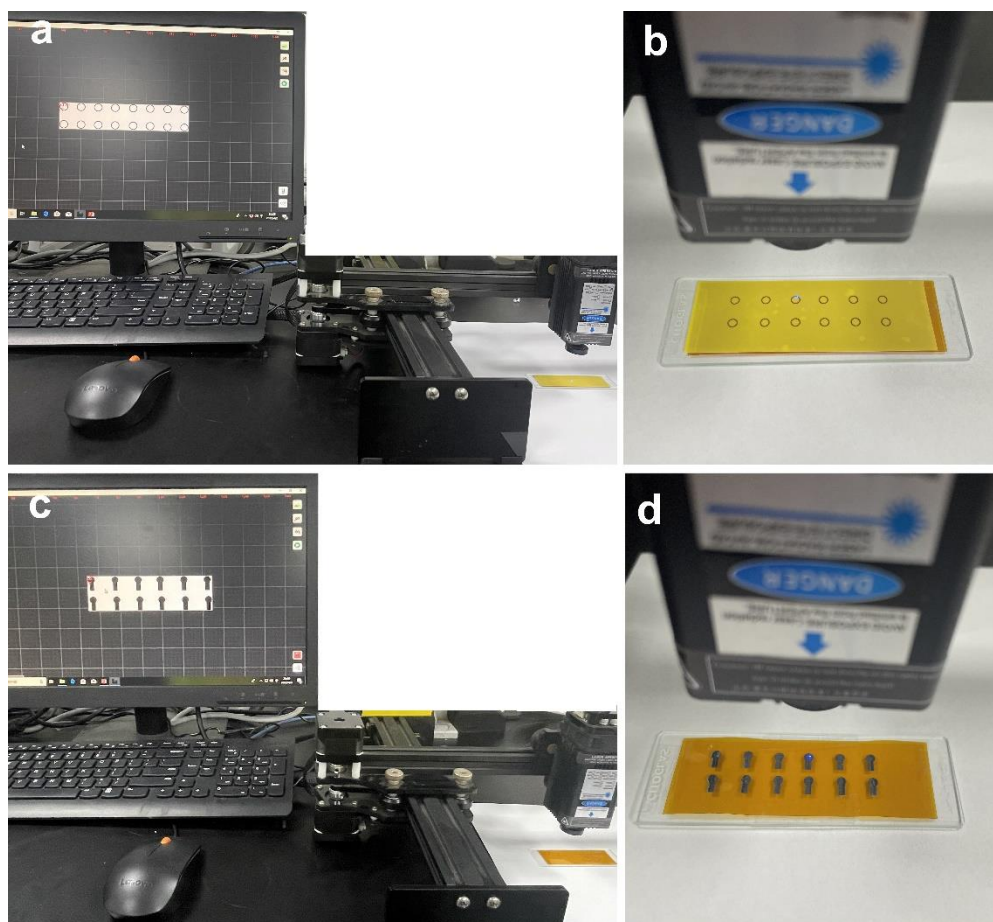

**Figure S1.** Photos of (a, c) the laser engraving machine with different engraving templates and the laser engraving of (b) the circular hole pattern on the PVC tape or (d) the LIG-In-CdS electrodes.

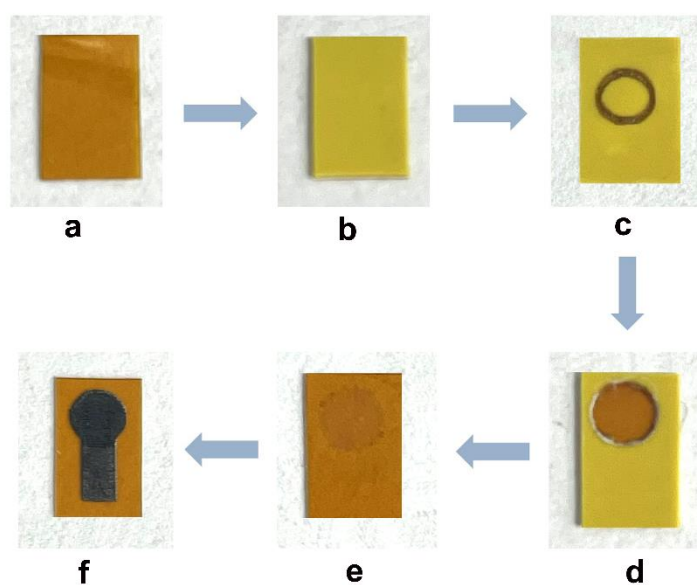

**Figure S2.** Photographic images of the laser engraving process for the preparation of LIG-In-CdS: (a) a PI film, (b) the PI film with a layer of PVC tape, (c) a circular hole pattern formed in the tape, (d) PI film with a Cd<sup>2+</sup>, In<sup>3+</sup> and Cys-containing CS membrane and then peeling the tape (e), (f) laser-induced LIG-In-CdS electrode.

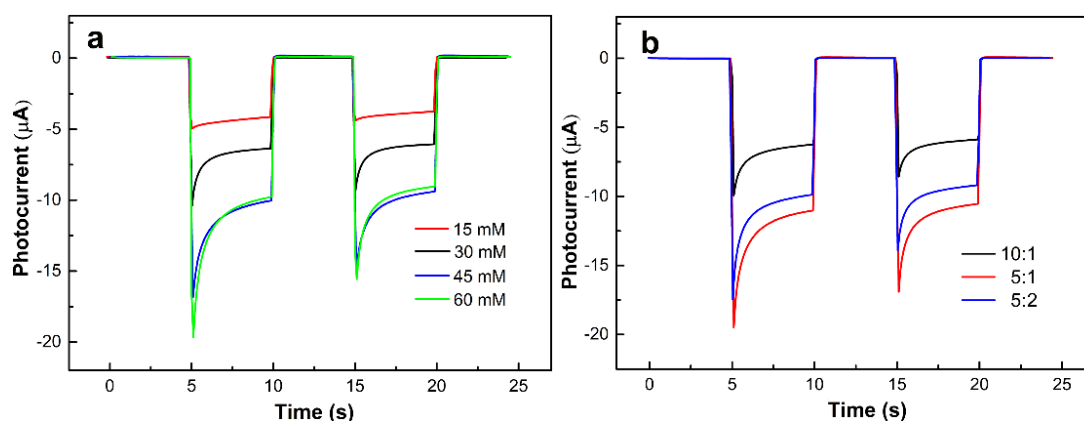

**Figure S3.** Optimization of the Cys concentration for laser-induced CdS photoelectrodes (CS as the polymer). Optimization of the concentration ratio of Cd and In for laser-induced In-CdS photoelectrodes (CS as the polymer, Cys as the sulfur source).

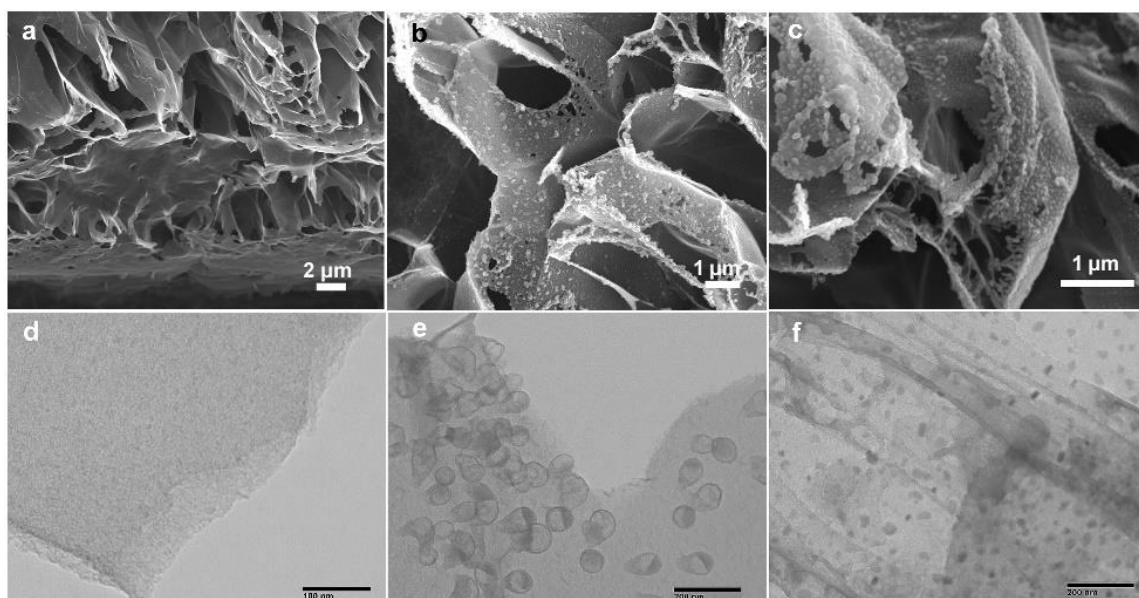

**Figure S4.** SEM images of (a) LIG, (b) LIG-In, and (c) LIG-CdS. TEM images of (d) LIG, (e) LIG-In, and (f) LIG-CdS.

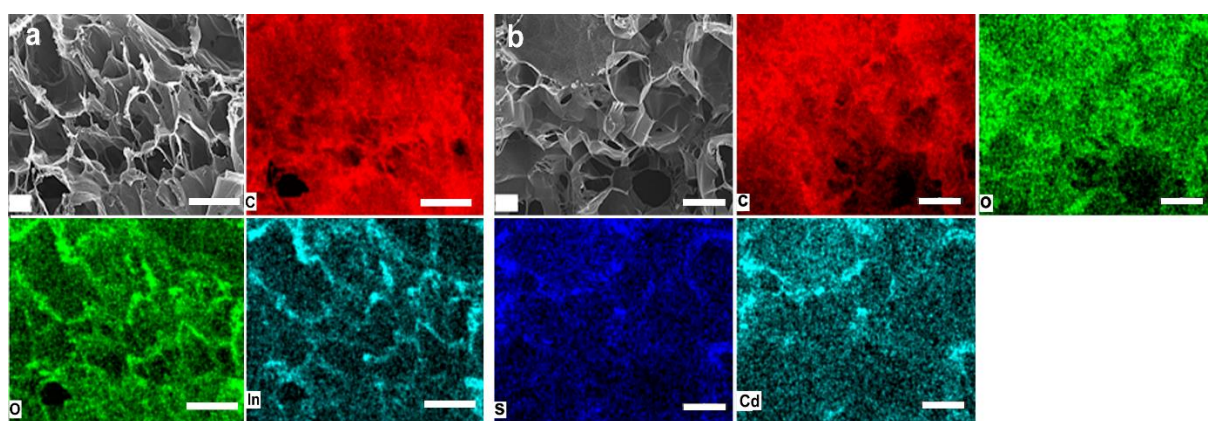

**Figure S5.** Elemental mapping images of (a) LIG-In and (b) LIG-CdS, scale bars: 5  $\mu\text{m}$ .

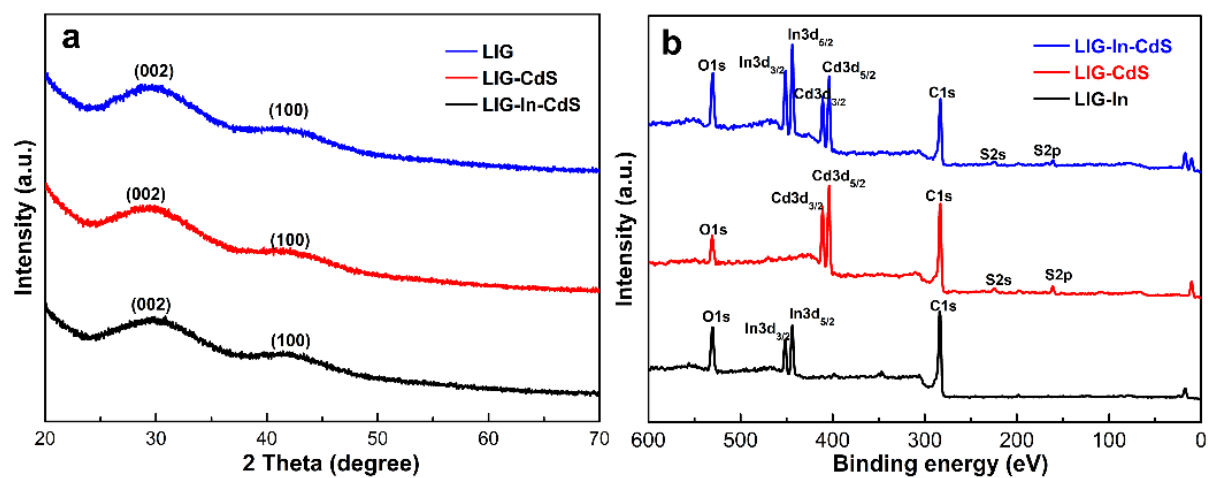

**Figure S6.** (a) XRD patterns of LIG, LIG-CdS, and LIG-In-CdS. (b) XPS survey spectra of LIG-In, LIG-CdS, and LIG-In-CdS.

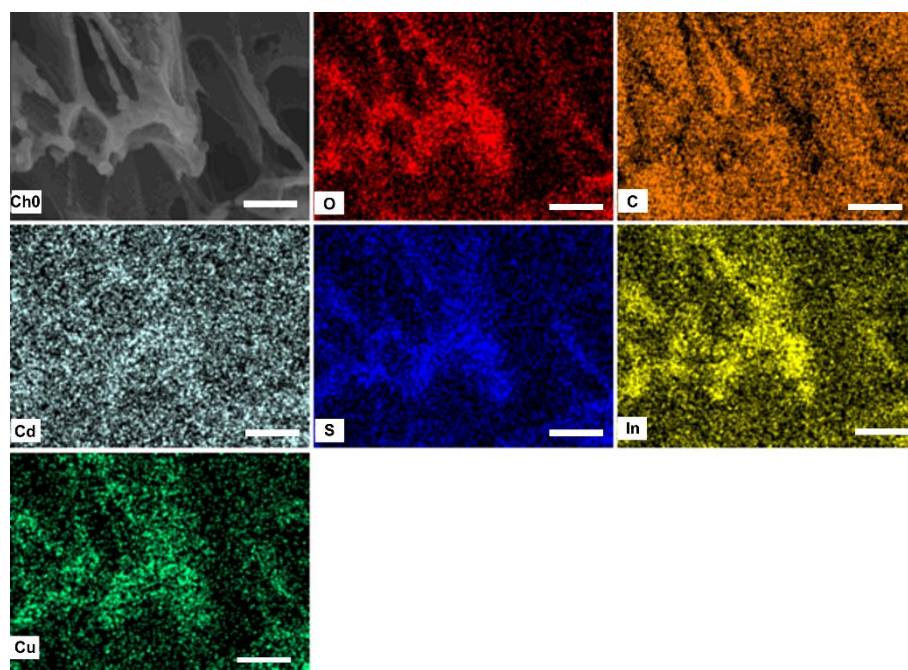

**Figure S7.** Elemental mapping images of LIG-In-CdS/Cu<sup>2+</sup>, scale bars: 1  $\mu$ m.
